# Supplementary material for: Bushpig (Potamochoerus larvatus) Hunting in Rural Areas of Madagascar and Its Health and Socioeconomic Implications
Source: Frontiers journal article supplement (doi:10.3389/fcosc.2022.732626), 2022-02-03
Supplement: Table_1.DOCX [file Table_1.DOCX]

**Survey questionnaire bushpig Retailer/Butcher N° :** ………

1. Date : ……………………………………
2. Interviewer :…………………………………................................
3. Latitude : S……………….…………………………………………………..
4. Longitude : E ………………………………………………………………..
5. Altitude : ………………………………
6. District :…………………………………………………………………………………………………………………
7. Commune :……………………………………………….…………………………………………………………..
8. Fokontany :……………………………………..…………………………………………………………………...
9. Localité : …………………………………………………………….…………………………………………………
10. Name of the butcher/retailer:…………………………………………………………................
11. Age :

- ˂20 yo Between 20 and 40 ans >40 yo

1. Activity : ………………………………………………………………………………………………………

**Description de l’activité**

1. How long have you been collecting/selling bushpig meat ?......................................
2. 14 Do you have any other activity than trading bushpig meat??

- Yes  No
  1. If yes, what other activity?..........................................................................

1. How do you source bushpig meat?

- Auprès de chasseurs, précisez..................... ..............................
- Auprès de revendeurs, précisez : .................. ............................
- Dans des marchés, précisez : ..................... ..............................
- Autre : ........................ .............................. ..............................

1. How often do you buy bushpig ?..............................
2. Is there a period when you get more bushpig ?

- Yes  No
  1. If yes, which period? J F M A M J J A S O N D

1. How do you buy bushpigs?

- Alive
- Dead, whole carcass
  - Eviscerated
  - Uneviscerated
- Dead, carcass parts or meat

1. Is there a period when you sell more bushpig meat ?

- yes  No
  1. If yes, which period ? J F M A M J J A S O N D

1. How do you determine the sales prices?

- Size State
- Period of the month Period of the year
- Customer Fixed price
- Other : …………………………………………………………………………………………………

1. Bushpig price

- Purchase price: ........................................... per kg
- Selling price:................................................ per kg

1. Do prices change during the year? yes No
   1. If so, at what time of the month/year do prices fluctuate?

- Period of the month: ……………………………………………………………
- Period of the year : J F M A M J J A S O N D

1. How many bushpigs did you buy last year?

- <5 5-10 11-20 >20
  1. If at least one bushpig purchased, specify origin(s)

| Locality | Fokontany | District | Distance | Supplier | Nb bushpig |
| --- | --- | --- | --- | --- | --- |
|  |  |  |  | - Hunter - Reseller - Other............... | <5  5-10  11-20  >20 |
|  |  |  |  | - Hunter - Reseller   Other............... | <5  5-10  11-20  >20 |
|  |  |  |  | - Hunter - Reseller   Other............... | <5  5-10  11-20  >20 |

1. How many bushpigs did you sell last year?

- <5 5-10 11-20 >20
  1. If at least one bushpig sold, specify the destination(s)

| Locality | Fokontany | District | Distance | Destinataire | Nb bushpig |
| --- | --- | --- | --- | --- | --- |
|  |  |  |  | - Hunter - Reseller   Other............... | <5  5-10  11-20  >20 |
|  |  |  |  | - Hunter - Reseller   Other............... | <5  5-10  11-20  >20 |
|  |  |  |  | - Hunter - Reseller   Other............... | <5  5-10  11-20  >20 |

1. What is the financial contribution of the bushpig meat trade to the household income?

- Main source of income 2nd source of income
- 3rd source of income 4th source of income

1. What profits do you make per year?...................................................................
2. Do you find that the demand for bushmeat?

- Increasing Stable Decreasing

.

1. How do you sell potamochers ?

- Alive
- Dead, whole carcass
  - Eviscerated
  - Uneviscerated
- Morts, morceaux de carcasse ou viande

**Transport/contact and conservation**

1. 29 Do you collect/sell other wildlife species? yes No
   1. If yes, which species ? :……………………………………………………………………………….
2. What mode of transport do you use for bushpigs (killed or live)?

- By foot Bicycle
- Cart/ rickshaw Car/Truck
- Other…………………….

1. Do you ever slaughter bush pigs?

- Yes No
  1. If yes, are the carcass viscera:
- Abandoned at the site of evisceration
- Buried
- Burned
- Consumed by humans
- Consumed by animals, specify : ………….…
  1. If yes, do domestic animals have access :
- At the place where bushpigs are slaughtered
- At the place where the waste from the bushpig carcasses is disposed of
- No access to these locations
  - 1. If access, which species ?.............................................................

1. How do you store bushpig meat at home?

- Alive Fridge, freezer
- Smoking No special measures (in the shade, dry)
- Other :…………………………………………………………………………………………………..

1. How many days do you keep purchased bushpigs before selling/slaughtering them ?............................................................................................................
2. During this period, can bushpigs come into contact with domestic animals:

- Yes No
  1. If yes, which species  :………………………..………………………………………………….

**Diseases**

1. Have you ever seen sick bushpigs? yes No
   1. If yes, what were the signs observed ………………………………………………….
   2. If yes, have you ever eaten sick bushpigs? yes No
2. Do you think it is possible to get diseases from eating bushpig meat? yes No
   1. If yes, which one ? …………………………………………………………………………………..…
   2. If No, why ?...........................................................................................
3. Do you think it is possible to get diseases from handling bushpig meat? yes No
   1. If yes, which one ? ………………………………………………………………………………………
   2. If No, why ?...........................................................................................
4. Are there any domestic pigs in the village? yes No
   1. If yes, were there any sick or dead pigs in the village last year?

yes No

- - 1. If yes, which symptoms?……………………………………………………

1. Has there ever been swine fever in the village? Oui Non
   1. If yes, in which year?..................................................................
   2. If yes, how many pigs died?.............................................
2. Were there any people with epilepsy in the village last year? yes No

**Notes**

|  |
| --- |
