# Supplementary material for: Bushpig (Potamochoerus larvatus) Hunting in Rural Areas of Madagascar and Its Health and Socioeconomic Implications
Source: Frontiers journal article supplement (doi:10.3389/fcosc.2022.732626), 2022-02-03
Supplement: Table_2.DOCX [file Table_2.DOCX]

**Survey questionnaire hunter N° :** ……….…

1. Date : ……………………………………
2. Interviewer : …………………………………................................
3. Latitude : S…………………………………………………………………..
4. Longitude : E ………………………………………………………………..
5. Altitude : ………………………………
6. District :………………………………………………………………………………………………………….
7. Commune :……………………………………………….…………………………………………………….
8. Fokontany :……………………………………..…………………………………………………………….
9. Locality : …………………………………………………………….…………………………………………
10. Name of the hunter : …………………………………………...................................
11. Age:

- ˂20 yo Between 20 and 40 yo >40 yo

1. Number of people in the family:……………………………………………………..

**General information on bushpigs**

1. Presence of bushpig around the village: Yes No
   1. If yes, in which month(s) of the year: J F M A M J J A S O N D
   2. If yes, what is the minimum distance from the village: .............. (metres)
   3. If yes, do villagers protect their crops from bushpig? Yes No
      1. If yes, how …………………………………………………………….……………….
   4. Number of bushpigs compared to 10 years ago?

Less than 10 years ago As much More than 10 years ago

- 1. How many bushpig hunters are there in the village? ......................

**Description of the bushpig hunting activity**

1. How long have you been hunting?..............................................................................
2. Why do you hunt? (rank among the reasons given)

- Personal consumption (....) Gift to friends/acquaintances (....)
- Sale (....) Crop protection (....)
- Other: .....................................................................................................

1. When do you hunt? J F M A M J J A S O N D
2. Which hunting season is the best?

- Wet season Dry season No season better than another

1. In what type of place do you hunt?

- Rice field or other crops Forest
- Savannah Next to the village/dwelling
- Other :……………………………………………………………………..................................

1. Do you hunt in the same place? Yes No

Why ?..........................................................................................................

1. What hunting technique do you use?

- Kotona trapping (Number of kotona :........................)
- Cable trapping (Number of cables :........................)
- Lance ( without dog with dog)
- Rifle ( alone to several)
- Other : ....................................................................................

1. How many bushpigs did you hunt last year :
   1. By trapping? 0 1-5 5-10 11-20 >20
   2. With a lance? 0 1-5 5-10 11-20 >20
   3. By another method?...................... 0 1-5 5-10 11-20 >20
2. How many bush pigs did you sell last year?

0 1-5 5-10 11-20 >20

- 1. If sold, place(s) of sale:

| Locality | Fokontany | District | Distance | Buyer | Quantité |
| --- | --- | --- | --- | --- | --- |
|  |  |  |  | Restaurateur  Villagers  Other……………… | <5  5-10  11-20  >20 |
|  |  |  |  | Restaurateur  Villagers  Other……………… | <5  5-10  11-20  >20 |
|  |  |  |  | Restaurateur  Villagers  Other……………… | <5  5-10  11-20  >20 |

- 1. If sold, selling price: ……………………………………………………………………………

1. What other species do you hunt?............................................................................
2. Are there any pig farms near the place where you hunt? Yes No
   1. If yes, how many pigs? …………………………………………………….
   2. If so, what kind of confinement?

- Permanent enclosure in a pen/building
- Free range a few hours a day, enclosure/building the rest of the time
- Completely roaming
- At stake
- Other: ...........................................................................................

1. In addition to this hunting activity, do you carry out any of the following activities?

- Pig farmer Butcher / Meat trader
- Collector/transporter of livestock products or animals
- Other :……………………………………………………………………..................................
- No other activity

**Conservation/Transport/** **Contact with hunted bushpigs**

1. Do you ever keep live captured pota in the village?? Yes No
   1. If yes, how many days..........................
   2. If yes, is it possible for live captured bushpigs to come into contact with domestic animals? yes No
      1. If yes, which species ?................................................................
   3. If yes, at the time of the slaughter of the bushpigs in the village, do domestic animals have access :

- At the place where bushpigs are slaughtered
- At the place where the waste from the bushpig carcasses is disposed of
- No access to these locations
  - 1. If access, which species?............................................

1. Do you eviscerate on the spot the bushpigs killed during the hunt?

- Yes No
  1. If yes, are the carcass viscera:
- Abandoned at the site of evisceration
- Buried
- Burned
- Consumed by humans
- Consumed by animals, specify: ...................................................

1. What mode of transport do you use for bushpigs (killed or live)?

- By foot Bicycle
- Cart/ rickshaw Car/Truck
- Other…………………….

1. How (how many days) do you keep bushpig meat at home?

- No special measures (in the shade, dry) (....................)
- Canning (.............)
- Other : ......................................................................... (............)

1. Is bushpig meat available to domestic animals? yes No
   1. If yes, which specie (s) ?.............................................................................
2. How many bushpigs did you eat last year?.....................
   1. If consumed, cooking methods: ……………………………………………………..

**Diseases**

1. Have you ever seen sick bushpigs? yes No
   1. If yes, what were the signs observed ………………………………………………….
   2. If yes, have you ever eaten sick bushpigs? yes No
2. Have you ever found dead bushpigs in the nature? Yes No
   1. If yes, have you ever eaten a dead bushpig? yes No
3. Do you think it is possible to get diseases from eating bushpig meat?

yes No

- 1. If yes, which one ? ………………………………………………………………………………………
  2. If No, why ?...........................................................................................

1. Do you think it is possible to get diseases from handling bushpig meat? yes No
   1. If yes, which one ? ………………………………………………………………………………………
   2. If No, why ?...........................................................................................
2. Are there any domestic pigs in the village? yes No
   1. If yes, possible contact with bushpigs: yes No
   2. If yes, sharing the same spaces with bushpigs: yes No
      1. If yes, where …………………………………………………………….……………….
   3. If yes, hybrids already observed: yes No
   4. If yes, were there any sick or dead pigs in the village last year?

yes No

- - 1. 36.4.1 If yes, which symptoms?……………………………………………………

1. Has there ever been swine fever in the village? yes No
   1. If yes, in which year(s) ?..................................................................
   2. If yes, how many pigs died?.............................................
2. Were there any people with epilepsy in the village last year? yes No

**Notes**

|  |
| --- |
