# Supplementary material for: Bushpig (Potamochoerus larvatus) Hunting in Rural Areas of Madagascar and Its Health and Socioeconomic Implications
Source: Frontiers journal article supplement (doi:10.3389/fcosc.2022.732626), 2022-02-03
Supplement: Table_3.DOCX [file Table_3.DOCX]

**Survey questionnaire Pig farmers N° :** ……………..

1. Date : ……………………………………
2. interviewer : ………………………………………………………………………………………………………....
3. Latitude : S……………….…………………………………………………..
4. Longitude : E ………………………………………………………………..
5. Altitude : ………………………………
6. District :…………………………………………………………………………………………………………………
7. Commune :……………………………………………….…………………………………………………………..
8. Fokontany :……………………………………..…………………………………………………………………...
9. Locality : …………………………………………………………….…………………………………………………
10. Name of the farmer..…………………………………………….........................................
11. Age of the farmer:

- ˂20 y o Between 20 - 40 ans >40 y o

1. Main motivation for pig farming:

- Main source of income Additional source of income
- Family consumption Other : ………………………………….….

**Animaux**

1. Type of farming:

- Breeder Farrowing farm / breeder
- Fattener Farrow-to-finish farm

1. Breed :

- Local breed / Gasy Genetically improved breed (cross-breeding with Landrace or Large White)
- Mixed

1. Number of Sows currently on farm:……… Number of Boars currently on farm:………

Number of Fattening pigs currently on farm:………..

Number of Piglets currently on farm:……….

**Feeding**

1. Type:

- Industrial feed Crop by-products (rice bran, etc)
- Food waste/kitchen scraps
- Other : ……………………………………………………………………………………………….
  1. If food waste/kitchen waste, does it sometimes contain:
- Pork (meat, blood, other carcass parts, etc)
- Bushpig (meat, blood, other carcass parts, etc)

1. Water source :

- tap (JIRAMA) Individual well Public well
- Other………………………………………………………………………………………………

**Housing**

1. Claustration of pigs :

- Maintained in a pigsty or house with a roof
- maintained in pens permanently
- part time free-ranging and part-time in pens or pigsty
- all the time free-ranging pigs
- kept attached / tethered (outside)
- Other : ……………………………………………………………………………………………….
  1. If total roaming, specify where the pigs are bedded :…………………………

1. If using pens/buildings, number of pens/buildings: ……………………
   1. Walls/fences :

- cement / concrete or metal or stone
- mud walls or bricks
- wooden fences (with spaces)
- closed wooden fences
- other: ……………………………………………………………………………………………….
  1. Soil :
- cement / concrete Soil
- Sand Wooden floor
- Other : ……………………………………………………………………………………………….
  1. Litter :
- No bedding
- Straw Wood shavings
- Other : ……………………………………………………………………………………………….
  1. Roof :
- No roofing
- Sheet metal Straw/leaves Wood
- Other : ……………………………………………………………………………………………….
  1. Separation of the enclosure/building into several boxes:
- Without separation
- With separation (specify type)………………………………………………………………….

**Reproduction**

1. Method of reproduction :

- None Natural mounting with boars from the farm
- Natural mounting with boar from another farm (specify place/ fok/ districts of origin).………………………………………………………………………………….)

1. Do you lend your boars to other breeders for natural breeding?

yes No

- 1. If yes, specify localities/ fokontanys/ districts …………………………………………………………………………………………………………………

**Slaughtering and marketing**

1. Number of pigs (any age/sex) purchased last year: ………………
   1. If purchase ≥1, in which month(s) did you purchase: J F M A M J J A S O N D
   2. If purchase ≥1, specify origin(s):

| Locality | (market?  village?) | Fokontany | District | Distance | Seller | Nb pigs |
| --- | --- | --- | --- | --- | --- | --- |
|  | |  |  |  | Collector  farmer  Other……………… |  |
|  | |  |  |  | Collector  farmer  Other……………… |  |
|  | |  |  |  | Collector  farmer  Other……………… |  |
|  | |  |  |  | Collector  farmer  Other……………… |  |

- 1. If purchase ≥1, average purchase price : ………………
  2. If purchase ≥1, is there a time of year when you buy more? yes No
     1. If yes, specify the months of the year: J F M A M J J A S O N D

1. Number of pigs (any age/sex) sold live last year : ………………
   1. If sale ≥1, in which month(s) did you sell : J F M A M J J A S O N D
   2. If sale ≥1, specify destination(s):

| Locality | (market?  village?) | Fokontany | District | Distance | Buyer | Nb pigs |
| --- | --- | --- | --- | --- | --- | --- |
|  | |  |  |  | Collector  farmer  Other……………… |  |
|  | |  |  |  | Collector  farmer  Other……………… |  |
|  | |  |  |  | Collector  farmer  Other……………… |  |
|  | |  |  |  | Collector  farmer  Other……………… |  |

- 1. If sale ≥1, average sale price: ……………………………………………………………
  2. If sale ≥1, is there a time of year when you sell more? yes no
     1. If yes, specify the months of the year: J F M A M J J A S O N D

1. Do you slaughter at home? Yes No
   1. If yes, number of pigs (regardless of age/sex) slaughtered last year for :

Household consumption ................. Sale of meat.............

Management of sick animals .............. Other: ..............................

- 1. If selling meat from pigs slaughtered at home, specify the destination(s) :

| Locality | (market?  village?) | Fokontany | District | Distance | Byuer | Nb pigs |
| --- | --- | --- | --- | --- | --- | --- |
|  | |  |  |  | Collector  farmer  Other……………… |  |
|  | |  |  |  | Collector  farmer  Other……………… |  |
|  | |  |  |  | Collector  farmer  Other……………… |  |
|  | |  |  |  | Collector  farmer  Other……………… |  |

**Presence of other suidae**

1. Presence of other pig farms in the vicinity: yes No
   1. If yes, how many within 200 metres: ………………………..
   2. If yes, possible contact with pigs on the farm : Yes No
2. Is there a forest nearby: yes No
   1. If yes, how far from the farm: ………………….. (m)
3. Presence of bushpigs in the vicinity: yes No
   1. If yes, in which month(s) of the year : J F M A M J J A S O N D
   2. If yes, possible contact with pigs on the farm: Yes No
   3. If yes, sharing the same spaces with bushpigs: Yes No
      1. If yes, specify where…………………………………………………….……………….
   4. If yes, hybrids already observed on the farm: Yes No
   5. If yes, do you protect your crops from bushpigs? Yes No
      1. If yes, how ………………………………………….
   6. If yes, number of bushpigs compared to 10 years ago?

Less than 10 years ago As much More than 10 years ago

- 1. If so, how many bushpig hunters are there in the village?.......................
  2. If so, do you ever hunt bushpig? Yes No
  3. If so, do you ever eat bushpig? Yes No

**People with access to pig farming**

1. Persons authorised to enter the farm :

- Collector
- Butcher
- Friends / family
- Other pig farmers
- Technicians / Veterinarians
- Nobody is allowed on the farm
- Other

1. Among the people allowed to enter the farm, are any of them:

- Also keep pigs
- Hunt bushpig
- Eat bushpig meat

**Health aspects**

1. Disease prevention methods (specify product/protocol/frequency/stakeholder)

- Vaccination.............................................................................................
- Deworming ...........................................................................................
- Treatment of pigs against external parasites ...............................
- Treatment of buildings/pens against rodents...........................
- Treatment of buildings/pens against insects.............................
- Cleaning of buildings/pens.................................................................
- Disinfection of buildings/pens.............................................................
- Quarantine.......................................................................
- External fencing of the farm.................................................................
- Foot bath at entrance to building/paddock..................................................
- Cloakroom and shower at the entrance to the buildings/paddocks...............................
- Other: ...................................................

1. Were there any sick or dead pigs last year? Yes No
   1. If yes, specify:

| Disease/Syndrome | Moment of the year | Nb pigs | | |
| --- | --- | --- | --- | --- |
| present | sick | dead |
|  | J F M A M J J A S O N D |  |  |  |
|  | J F M A M J J A S O N D |  |  |  |
|  | J F M A M J J A S O N D |  |  |  |

31.2 If yes, what did you do :

- Slaughter of sick animals Slaughter of healthy animals
- Sale of sick animals Sale of healthy animals
- Self-treatment Separation of sick and healthy
- Consult health care personnel (vet/other)
- Other : ……………………………………………………………………………………………….

1. 32 Have there been any unfit pigs on your farm? yes No

32.1 If yes, in which year(s)? .................................................................

32.2 If yes, how many have been detected by tonguing: .........

32.3 If yes, how many were detected during meat inspection:.........

1. Has there ever been swine fever on your farm? Yes No

33.1 If Yes, in which year(s)?..................................................................

33.2 If yes, how many pigs died ?.............................................

1. Which pig health problems do you consider to be the most damaging on your farm? ……………………………………………………………………………………………………

**Notes**

|  |
| --- |
